# Supplementary material for: An outbreak of cutaneous abscesses caused by Panton-Valentine leukocidin-producing methicillin-susceptible Staphylococcus aureus among gold mine workers, South Africa, November 2017 to March 2018
Source: Springer Nature journal article supplement (doi:10.1186/s12879-020-05352-5), 2020-08-24
Supplement: MOESM1 [file 18309438]

## 2017 SKIN ABSCESS OUTBREAK: QUESTIONNAIRE – CROSS-SECTIONAL STUDY

### Instructions

1. Read the introduction and the informed consent form to the potential participant.
2. Obtain individual's signature if they agree to participate.
3. Hand an information sheet to participants to keep with them.
4. If the individual does not agree to participate, complete the refusal section.
5. If the individual agrees to participate, determine whether the individual meets the inclusion criteria: *Any person aged 18 years or older, engaged in underground work and employed for at least one month (as of the date of interview) at the Gold Mine.*
6. For all participants who do not have a skin lesion or bump anywhere on their body, sections A-F should be completed by the interviewer
7. For all participants who have a skin lesion or bump anywhere on their body, sections A-G should be completed by the interviewer and referred to a doctor or nurse to complete sections H-I. Obtain individual's signature if they agree to have a sample taken.
8. Read out all the possible options before selecting an appropriate option.

## Introduction

Hello. My name is \_\_\_\_\_

I work for the National Institute for Communicable Diseases (NICD). There have been mine workers who have been affected with skin lesions at the gold mine. The NICD has been requested by the management of the gold mining company to assist with an investigation.

I would like to ask you some general questions about your health and the work that you do at the mine. We will record your answers on a questionnaire. This interview will take about 20 minutes.

All employee information will be kept confidential and will only be used for the purposes of this investigation. There should be no risk if you agree to take part in the investigation.

We hope that by collecting the information we will be able to prevent further cases at the mine.

Do you agree to be interviewed?

- 1 Yes (obtain participant signature, continue with the interview)  
 2 No (complete the refusal section)

Participant signature: \_\_\_\_\_ Date: 21 February 2018

Reason for not agreeing to be interviewed

- 1 Not interested  
 2 Too busy  
 3 Concerned about confidentiality of information provided  
 4 Other (specify): \_\_\_\_\_

| SECTION A: INCLUSION CRITERIA                 |                                                                            |                                                                                |                                                                                                   |
|-----------------------------------------------|----------------------------------------------------------------------------|--------------------------------------------------------------------------------|---------------------------------------------------------------------------------------------------|
| <b>Q1</b>                                     | <b>Q1.1</b> Are you aged 18 years or older?                                | <input type="checkbox"/> 1 Yes<br><input type="checkbox"/> 2 No                | <b>If Yes to all four questions (Q1.1 to Q1.4), skip to Q2</b><br><b>If No, end questionnaire</b> |
|                                               | <b>Q1.2</b> Are you engaged in underground work?                           | <input type="checkbox"/> 1 Yes<br><input type="checkbox"/> 2 No                |                                                                                                   |
|                                               | <b>Q1.3</b> Are you employed at the gold mine?                             | <input type="checkbox"/> 1 Yes<br><input type="checkbox"/> 2 No                |                                                                                                   |
|                                               | <b>Q1.4</b> Have you been working at the gold mine for at least one month? | <input type="checkbox"/> 1 Yes<br><input type="checkbox"/> 2 No                |                                                                                                   |
| <i>If the inclusion criteria are not met:</i> |                                                                            | <b>Thank you for your time. We will not include you in the study. Goodbye.</b> |                                                                                                   |

| SECTION B: OUTCOME STATUS |                                                                                                                |                                                                 |                                                                                                                                                                                      |
|---------------------------|----------------------------------------------------------------------------------------------------------------|-----------------------------------------------------------------|--------------------------------------------------------------------------------------------------------------------------------------------------------------------------------------|
| <b>Q2</b>                 | <b>Q2.1</b> Do you at this moment have a skin lesion or bump anywhere on your body (head, neck, arms, or legs) | <input type="checkbox"/> 1 Yes<br><input type="checkbox"/> 2 No | <b>If Yes, continue with Q2.2, complete sections A-G and refer to doctor or nurse to complete sections H-I</b><br><br><b>If No, complete sections A-F only and end questionnaire</b> |
|                           | <b>Q2.2</b> Where do you think that you got these skin lesion(s) or bumps on your body from?                   |                                                                 |                                                                                                                                                                                      |

## QUESTIONNAIRE

| SECTION C: INTERVIEWER DETAILS |                                                                     |                                                                                                                  |  |
|--------------------------------|---------------------------------------------------------------------|------------------------------------------------------------------------------------------------------------------|--|
| <b>Q3</b>                      | Name and surname / initials of person completing the questionnaire: |                                                                                                                  |  |
| <b>Q4</b>                      | Date of interview (DD/MM/YYYY):                                     | 21/02/2018                                                                                                       |  |
| <b>Q5</b>                      | Shift                                                               | <input type="checkbox"/> 1 Morning<br><input type="checkbox"/> 2 Afternoon<br><input type="checkbox"/> 3 Evening |  |

**Continue with SECTION D: EMPLOYEE DETAILS**

| <b>SECTION D: EMPLOYEE DETAILS</b> |                                                                                                                                                |                                                                                                                                                                                                                                                                                                                                                                                                                                                         |  |
|------------------------------------|------------------------------------------------------------------------------------------------------------------------------------------------|---------------------------------------------------------------------------------------------------------------------------------------------------------------------------------------------------------------------------------------------------------------------------------------------------------------------------------------------------------------------------------------------------------------------------------------------------------|--|
| <b>Q6</b>                          | Sex (observation)                                                                                                                              | <input type="checkbox"/> 1 Male<br><input type="checkbox"/> 2 Female                                                                                                                                                                                                                                                                                                                                                                                    |  |
| <b>Q7</b>                          | What is your date of birth (DD/MM/YYYY)?<br>If the participant does not know his / her date of birth; ask how old he or she is (age in years). | <input type="checkbox"/> 1 Known _____<br><input type="checkbox"/> 2 Unknown _____ years                                                                                                                                                                                                                                                                                                                                                                |  |
| <b>Q8</b>                          | Where do you stay after work?                                                                                                                  | <input type="checkbox"/> 1 Mine hostel<br><input type="checkbox"/> 2 Living out<br><input type="checkbox"/> 3 Unknown                                                                                                                                                                                                                                                                                                                                   |  |
| <b>Q9</b>                          | When did you start working at gold mine (DD/MM/YYYY)?                                                                                          |                                                                                                                                                                                                                                                                                                                                                                                                                                                         |  |
| <b>Q10</b>                         | How long have you worked at gold mine?                                                                                                         | <input type="checkbox"/> 1 Less than 12 months<br><input type="checkbox"/> 2 1 to 3 years<br><input type="checkbox"/> 3 4 to 5 years<br><input type="checkbox"/> 4 More than 5 years<br><input type="checkbox"/> 5 Unknown                                                                                                                                                                                                                              |  |
| <b>Q11</b>                         | What is your occupation?                                                                                                                       | <input type="checkbox"/> 1 Machine/rock drill operator<br><input type="checkbox"/> 2 Scraper winch operator<br><input type="checkbox"/> 3 Stope team member<br><input type="checkbox"/> 4 Development team member<br><input type="checkbox"/> 5 Load operator<br><input type="checkbox"/> 6 Loco operator<br><input type="checkbox"/> 7 Engineering assistant<br><input type="checkbox"/> 8 Other (specify) _____<br><input type="checkbox"/> 9 Unknown |  |
| <b>Q12</b>                         | What type of work are you involved in?                                                                                                         | <input type="checkbox"/> 1 Development<br><input type="checkbox"/> 2 Roving surface<br><input type="checkbox"/> 3 Roving underground<br><input type="checkbox"/> 4 Shaft and services<br><input type="checkbox"/> 5 Stopping<br><input type="checkbox"/> 6 Traming<br><input type="checkbox"/> 7 Other (specify) _____                                                                                                                                  |  |

Employee Industry Number: \_\_\_\_\_

|            |                                                                 |                                    |  |
|------------|-----------------------------------------------------------------|------------------------------------|--|
|            |                                                                 | <input type="checkbox"/> 8 Unknown |  |
| <b>Q13</b> | In which section of the mine do you currently work in (number)? |                                    |  |
| <b>Q14</b> | In which gang do you belong to?                                 |                                    |  |

**Continue with SECTION B: EMPLOYEE MEDICAL HISTORY**

| <b>SECTION B: EMPLOYEE MEDICAL HISTORY</b> |                                                                |                                                                                                                                                                                                                                                                                                                                                                                                                                                                                                                                                                                                                                                                                                                                                                                                                                                                                                                                                                                                                                                                                                                |  |
|--------------------------------------------|----------------------------------------------------------------|----------------------------------------------------------------------------------------------------------------------------------------------------------------------------------------------------------------------------------------------------------------------------------------------------------------------------------------------------------------------------------------------------------------------------------------------------------------------------------------------------------------------------------------------------------------------------------------------------------------------------------------------------------------------------------------------------------------------------------------------------------------------------------------------------------------------------------------------------------------------------------------------------------------------------------------------------------------------------------------------------------------------------------------------------------------------------------------------------------------|--|
| <b>Q15</b>                                 | Do you have any of the following medical conditions?           | <p><b>Q15.1 Diabetes mellitus</b><br/> <input type="checkbox"/> 1 Yes    <input type="checkbox"/> 2 No<br/> <input type="checkbox"/> 3 Unknown</p> <p><b>Q15.2 Tuberculosis (TB)</b><br/> <input type="checkbox"/> 1 Yes    <input type="checkbox"/> 2 No<br/> <input type="checkbox"/> 3 Unknown<br/>           If Yes, status of TB infection<br/> <input type="checkbox"/> 1 Previous    <input type="checkbox"/> 2 Current</p> <p><b>Q15.3 Cancer</b><br/> <input type="checkbox"/> 1 Yes    <input type="checkbox"/> 2 No<br/> <input type="checkbox"/> 3 Unknown<br/>           If Yes, specify what type<br/>           _____</p> <p><b>Q15.4 Skin conditions (for example eczema, psoriasis)</b><br/> <input type="checkbox"/> 1 Yes    <input type="checkbox"/> 2 No<br/> <input type="checkbox"/> 3 Unknown<br/>           If Yes, specify what type<br/>           _____</p> <p><b>Q15.5 Other medical condition</b><br/> <input type="checkbox"/> 1 Yes    <input type="checkbox"/> 2 No<br/> <input type="checkbox"/> 3 Unknown<br/>           If Yes, specify what type<br/>           _____</p> |  |
| <b>Q16</b>                                 | You may decide if you want to answer the next question or not. | <input type="checkbox"/> 1 Yes <input type="checkbox"/> 2 No<br><input type="checkbox"/> 3 Unknown                                                                                                                                                                                                                                                                                                                                                                                                                                                                                                                                                                                                                                                                                                                                                                                                                                                                                                                                                                                                             |  |

Employee Industry Number: \_\_\_\_\_

|            |                                                                                                                          |                                                                                                                                                                                                                                                                                                                                                                                                                          |                                                         |
|------------|--------------------------------------------------------------------------------------------------------------------------|--------------------------------------------------------------------------------------------------------------------------------------------------------------------------------------------------------------------------------------------------------------------------------------------------------------------------------------------------------------------------------------------------------------------------|---------------------------------------------------------|
|            | Are you HIV-positive?                                                                                                    | If Yes, are you on antiretroviral medication?<br><input type="checkbox"/> 1 Yes <input type="checkbox"/> 2 No<br><input type="checkbox"/> 3 Unknown                                                                                                                                                                                                                                                                      |                                                         |
| <b>Q17</b> | Do you have a history of smoking                                                                                         | <input type="checkbox"/> 1 Yes <input type="checkbox"/> 2 No<br>If Yes, are you a<br><input type="checkbox"/> 1 Current smoker<br><input type="checkbox"/> 2 Previous smoker<br><input type="checkbox"/> 3 Unknown                                                                                                                                                                                                       | If Yes, skip to <b>Q18</b><br>If No, skip to <b>Q20</b> |
| <b>Q18</b> | How many cigarettes do you smoke in one day?                                                                             |                                                                                                                                                                                                                                                                                                                                                                                                                          |                                                         |
| <b>Q19</b> | How long have you been smoking (years)?                                                                                  |                                                                                                                                                                                                                                                                                                                                                                                                                          |                                                         |
| <b>Q20</b> | Do you drink alcohol?                                                                                                    | <input type="checkbox"/> 1 Yes <input type="checkbox"/> 2 No                                                                                                                                                                                                                                                                                                                                                             | If Yes, skip to <b>Q21</b><br>If No, skip to <b>Q24</b> |
| <b>Q21</b> | How often do you drink alcohol?                                                                                          | <input type="checkbox"/> 1 Everyday<br><input type="checkbox"/> 2 Once a week<br><input type="checkbox"/> 3 Twice a week<br><input type="checkbox"/> 4 Three times a week<br><input type="checkbox"/> 5 More than three times a week<br><input type="checkbox"/> 6 Weekends only<br><input type="checkbox"/> 7 Once a month<br><input type="checkbox"/> 8 Other (specify)<br>_____<br><input type="checkbox"/> 9 Unknown |                                                         |
| <b>Q22</b> | What type of alcohol do you drink (beer, sorghum beer/umqomboti, cider, wine, brandy, whisky, vodka, gin, sherry, cane)? |                                                                                                                                                                                                                                                                                                                                                                                                                          |                                                         |
| <b>Q23</b> | What volume of alcohol do you drink at any given time (how many cans, glasses, shots, dumpi, quart, bottles, mixed)?     | Number of units: _____<br>Unit type (e.g. cans): _____<br>Volume (millilitres): _____                                                                                                                                                                                                                                                                                                                                    |                                                         |

**Continue with SECTION F: EXPOSURE INFORMATION**

**SECTION F: EXPOSURE INFORMATION**

|            |                                                                                                                           |                                                                                                                                                                                                                                                                                                                                                                                |                                                                                                            |
|------------|---------------------------------------------------------------------------------------------------------------------------|--------------------------------------------------------------------------------------------------------------------------------------------------------------------------------------------------------------------------------------------------------------------------------------------------------------------------------------------------------------------------------|------------------------------------------------------------------------------------------------------------|
| <b>Q24</b> | Have you noticed any cuts or scratches on your body (arms, head, neck or legs) over the last week?                        | <input type="checkbox"/> 1 Yes<br><input type="checkbox"/> 2 No<br><input type="checkbox"/> 3 Unknown                                                                                                                                                                                                                                                                          |                                                                                                            |
| <b>Q25</b> | Do you wear any personal protective equipment?                                                                            | <input type="checkbox"/> 1 Yes<br><input type="checkbox"/> 2 No<br><input type="checkbox"/> 3 Unknown                                                                                                                                                                                                                                                                          | <p>If Yes, skip to <b>Q26</b></p> <p>If No, skip to <b>Q39</b></p>                                         |
| <b>Q26</b> | At any given time, do you take off the following personal protective equipment? <b>(tick all that apply)</b>              | <input type="checkbox"/> 1 Overalls<br><input type="checkbox"/> 2 Gloves<br><input type="checkbox"/> 3 Masks<br><input type="checkbox"/> 4 Boots<br><input type="checkbox"/> 5 Goggles<br><input type="checkbox"/> 6 Helmets<br><input type="checkbox"/> 7 Knee protectors<br><input type="checkbox"/> 8 Arm protectors<br><input type="checkbox"/> 9 Other (specify)<br>_____ |                                                                                                            |
| <b>Q27</b> | For every shift that you have worked in the last week, how often have you worn personal protective equipment?             | <input type="checkbox"/> 1 Always (100%)<br><input type="checkbox"/> 2 Most of the time (80%)<br><input type="checkbox"/> 3 Sometimes (50%)<br><input type="checkbox"/> 4 Never (0%)                                                                                                                                                                                           | <p>If options 2-4 were selected skip to <b>Q28</b></p> <p>If option 1 was selected, skip to <b>Q29</b></p> |
| <b>Q28</b> | What are the reasons for not wearing your personal protective equipment all the time?                                     |                                                                                                                                                                                                                                                                                                                                                                                |                                                                                                            |
| <b>Q29</b> | Do you share any personal protective equipment with other mine workers?                                                   | <input type="checkbox"/> 1 Yes<br><input type="checkbox"/> 2 No<br><input type="checkbox"/> 3 Unknown                                                                                                                                                                                                                                                                          | <p>If Yes, skip to <b>Q30</b></p> <p>If No, skip to <b>Q31</b></p>                                         |
| <b>Q30</b> | Have you shared personal protective equipment with others who have or previously had skin lesions or bumps on their body? | <input type="checkbox"/> 1 Yes<br><input type="checkbox"/> 2 No<br><input type="checkbox"/> 3 Unknown                                                                                                                                                                                                                                                                          |                                                                                                            |
| <b>Q31</b> | How many sets of overalls do you use during one shift?                                                                    | <input type="checkbox"/> 1 One<br><input type="checkbox"/> 2 Two<br><input type="checkbox"/> 3 More than two<br><input type="checkbox"/> 4 Other (specify)<br>_____                                                                                                                                                                                                            | <p>If two or more than two or other, skip to <b>Q32</b></p> <p>If one, skip to</p>                         |

|            |                                                                                        |                                                                                                                                                                                                                                  |                                                                              |
|------------|----------------------------------------------------------------------------------------|----------------------------------------------------------------------------------------------------------------------------------------------------------------------------------------------------------------------------------|------------------------------------------------------------------------------|
|            |                                                                                        | <input type="checkbox"/> 5 Unknown                                                                                                                                                                                               | <b>Q33</b>                                                                   |
| <b>Q32</b> | If you use more than one set of overalls, where do you change into your work overalls? | <input type="checkbox"/> 1 Mine change rooms<br><input type="checkbox"/> 2 Underground<br><input type="checkbox"/> 4 Other (specify)<br>_____<br><input type="checkbox"/> 5 Unknown                                              |                                                                              |
| <b>Q33</b> | Where do you store your work overalls after a shift?                                   | <input type="checkbox"/> 1 Mine change rooms<br><input type="checkbox"/> 2 Underground<br><input type="checkbox"/> 3 Where you stay<br><input type="checkbox"/> 4 Other (specify)<br>_____<br><input type="checkbox"/> 5 Unknown | If underground, skip to <b>Q34</b><br>If not underground, skip to <b>Q36</b> |
| <b>Q34</b> | Do you rinse off your work overalls with water underground after a shift?              | <input type="checkbox"/> 1 Yes<br><input type="checkbox"/> 2 No<br><input type="checkbox"/> 3 Unknown                                                                                                                            |                                                                              |
| <b>Q35</b> | When do you bring up your work overalls from underground?                              | <input type="checkbox"/> 1 After every shift<br><input type="checkbox"/> 2 Once a week<br><input type="checkbox"/> 3 Twice a week<br><input type="checkbox"/> 4 Never                                                            |                                                                              |
| <b>Q36</b> | Do you wash your work overalls every day?                                              | <input type="checkbox"/> 1 Yes<br><input type="checkbox"/> 2 No<br><input type="checkbox"/> 3 Unknown                                                                                                                            | If No, skip to <b>Q37</b><br>If Yes, skip to <b>Q38</b>                      |
| <b>Q37</b> | How often do you wash your work overalls in a week?                                    | <input type="checkbox"/> 1 Nil/zero<br><input type="checkbox"/> 2 Once<br><input type="checkbox"/> 3 Twice<br><input type="checkbox"/> 4 More than two times<br><input type="checkbox"/> 5 Unknown                               |                                                                              |
| <b>Q38</b> | Where do you wash your work overalls?                                                  | <input type="checkbox"/> 1 Mine Laundromat<br><input type="checkbox"/> 2 Where you stay<br><input type="checkbox"/> 3 Other (specify)<br>_____<br><input type="checkbox"/> 4 Unknown                                             |                                                                              |
| <b>Q39</b> | Do you shower/bath at the mine change rooms after a shift?                             | <input type="checkbox"/> 1 Yes<br><input type="checkbox"/> 2 No<br><input type="checkbox"/> 3 Unknown                                                                                                                            | If No, skip to <b>Q40</b><br>If Yes, skip to <b>Q41</b>                      |
| <b>Q40</b> | Where do you shower/bath after a shift?                                                | <input type="checkbox"/> 1 Where you stay<br><input type="checkbox"/> 2 Other (specify)<br>_____                                                                                                                                 |                                                                              |



|            |                                                                                                                         |                                                                                                                                                                                                                   |                                                         |
|------------|-------------------------------------------------------------------------------------------------------------------------|-------------------------------------------------------------------------------------------------------------------------------------------------------------------------------------------------------------------|---------------------------------------------------------|
|            |                                                                                                                         | <input type="checkbox"/> 3 Unknown                                                                                                                                                                                |                                                         |
| <b>Q41</b> | Do you share a bedroom with anyone where you stay?                                                                      | <input type="checkbox"/> 1 Yes<br><input type="checkbox"/> 2 No<br><input type="checkbox"/> 3 Unknown                                                                                                             | If Yes, skip to <b>Q42</b><br>If No, skip to <b>Q46</b> |
| <b>Q42</b> | Do you share a bed with anyone where you stay?                                                                          |                                                                                                                                                                                                                   |                                                         |
| <b>Q43</b> | How many people do you share a bedroom with?                                                                            |                                                                                                                                                                                                                   |                                                         |
| <b>Q44</b> | What is the relationship of this person(s) with whom you share a bedroom with? ( <b>tick all that apply</b> )           | <input type="checkbox"/> 1 Family<br><input type="checkbox"/> 2 Friend(s)<br><input type="checkbox"/> 3 Co-worker(s)<br><input type="checkbox"/> 4 Other (specify)<br>_____<br><input type="checkbox"/> 5 Unknown |                                                         |
| <b>Q45</b> | Does anyone who you share a bedroom with have or previously had skin lesions or bumps?                                  | <input type="checkbox"/> 1 Yes<br><input type="checkbox"/> 2 No<br><input type="checkbox"/> 3 Unknown                                                                                                             |                                                         |
| <b>Q46</b> | Do you share a bathroom facility with anyone where you stay?                                                            | <input type="checkbox"/> 1 Yes<br><input type="checkbox"/> 2 No<br><input type="checkbox"/> 3 Unknown                                                                                                             | If Yes, skip to <b>Q47</b><br>If No, skip to <b>Q50</b> |
| <b>Q47</b> | How many people do you share a bathroom facility with?                                                                  |                                                                                                                                                                                                                   |                                                         |
| <b>Q48</b> | What is the relationship of this person(s) with whom you share a bathroom facility with? ( <b>tick all that apply</b> ) | <input type="checkbox"/> 1 Family<br><input type="checkbox"/> 2 Friend(s)<br><input type="checkbox"/> 3 Co-worker(s)<br><input type="checkbox"/> 4 Other (specify)<br>_____<br><input type="checkbox"/> 5 Unknown |                                                         |
| <b>Q49</b> | Does anyone who you share a bathroom facility with have or previously had skin lesions or bumps?                        | <input type="checkbox"/> 1 Yes<br><input type="checkbox"/> 2 No<br><input type="checkbox"/> 3 Unknown                                                                                                             |                                                         |
| <b>Q50</b> | Have you worked in a different section(s) of the mine over the last 12 months?                                          | <input type="checkbox"/> 1 Yes<br><input type="checkbox"/> 2 No<br><input type="checkbox"/> 3 Unknown                                                                                                             |                                                         |
| <b>Q51</b> | Have you worked in a different gang(s) over the last 12 months?                                                         | <input type="checkbox"/> 1 Yes<br><input type="checkbox"/> 2 No<br><input type="checkbox"/> 3 Unknown                                                                                                             |                                                         |
| <b>Q52</b> | Have you been in contact with anyone that has or previously had                                                         | <input type="checkbox"/> 1 Yes<br><input type="checkbox"/> 2 No                                                                                                                                                   | If Yes, skip to <b>Q53</b>                              |

|            |                                                                    |                                                                                                                                                                                                                |                                                                                                                                                 |
|------------|--------------------------------------------------------------------|----------------------------------------------------------------------------------------------------------------------------------------------------------------------------------------------------------------|-------------------------------------------------------------------------------------------------------------------------------------------------|
|            | skin lesion(s) or bumps on their body?                             | <input type="checkbox"/> 3 Unknown                                                                                                                                                                             | If No, end questionnaire if participant does not have skin lesions <b>OR</b> continue with <b>Q55</b> if the participant does have skin lesions |
| <b>Q53</b> | Were you in contact with this person(s) on more than one occasion? | <input type="checkbox"/> 1 Yes<br><input type="checkbox"/> 2 No<br><input type="checkbox"/> 3 Unknown                                                                                                          |                                                                                                                                                 |
| <b>Q54</b> | Please explain what was the relationship of this person(s) to you? | <input type="checkbox"/> 1 Family<br><input type="checkbox"/> 2 Friend(s)<br><input type="checkbox"/> 3 Co-worker(s)<br><input type="checkbox"/> 4 Other (specify) _____<br><input type="checkbox"/> 5 Unknown | End questionnaire if participant does not have skin lesions <b>OR</b> continue with <b>Q55</b> if the participant does have skin lesions        |

**Continue with SECTION G: HISTORY OF SKIN LESIONS**

| <b>SECTION G: HISTORY OF SKIN LESIONS</b> |                                                                                                                                                                                                                                                       |                                                                                                       |                                                                |
|-------------------------------------------|-------------------------------------------------------------------------------------------------------------------------------------------------------------------------------------------------------------------------------------------------------|-------------------------------------------------------------------------------------------------------|----------------------------------------------------------------|
| <b>Q55</b>                                | Did you have previous episodes of skin lesions or bumps?                                                                                                                                                                                              | <input type="checkbox"/> 1 Yes<br><input type="checkbox"/> 2 No<br><input type="checkbox"/> 3 Unknown | If Yes, skip to <b>Q56</b><br>If No, skip to <b>Q58</b>        |
| <b>Q56</b>                                | How many episodes* of skin lesions or bumps did you have?<br><br><i>*A new episode is defined when the skin lesion(s) presents on a different location on the body OR after the resolution of a previous episode of skin lesion(s) within 21 days</i> | <input type="checkbox"/> 1 Known Number: _____<br><input type="checkbox"/> 2 Unknown                  | If Known, skip to <b>Q57</b><br>If Unknown, skip to <b>Q58</b> |
| <b>Q57</b>                                | Date and location where skin lesions or bumps occurred<br><i>*Resolved is defined when the skin lesion(s) is healed OR a scar is present</i>                                                                                                          | <input type="checkbox"/> 1 First episode<br>Month/Year: _____<br>Location: _____                      |                                                                |

Employee Industry Number: \_\_\_\_\_

|  |  |                                                                                                                                                                                                                                                                                                                                                                                                                                                                                                                                                                                                                                                                                                                                                                                                                                                                                                                                                                                                                                                                                                                                                                                                                                                                                                                                                                                                                                                                                              |
|--|--|----------------------------------------------------------------------------------------------------------------------------------------------------------------------------------------------------------------------------------------------------------------------------------------------------------------------------------------------------------------------------------------------------------------------------------------------------------------------------------------------------------------------------------------------------------------------------------------------------------------------------------------------------------------------------------------------------------------------------------------------------------------------------------------------------------------------------------------------------------------------------------------------------------------------------------------------------------------------------------------------------------------------------------------------------------------------------------------------------------------------------------------------------------------------------------------------------------------------------------------------------------------------------------------------------------------------------------------------------------------------------------------------------------------------------------------------------------------------------------------------|
|  |  | <p>Resolved*: <input type="checkbox"/> 1 Yes <input type="checkbox"/> 2 No<br/><input type="checkbox"/> 3 Unknown</p> <p><input type="checkbox"/> 2 Second episode<br/>Month/Year: _____<br/>Location: _____<br/>Resolved: <input type="checkbox"/> 1 Yes <input type="checkbox"/> 2 No<br/><input type="checkbox"/> 3 Unknown</p> <p><input type="checkbox"/> 3 Third episode<br/>Month/Year: _____<br/>Location: _____<br/>Resolved: <input type="checkbox"/> 1 Yes <input type="checkbox"/> 2 No<br/><input type="checkbox"/> 3 Unknown</p> <p><input type="checkbox"/> 4 Fourth episode<br/>Month/Year: _____<br/>Location: _____<br/>Resolved: <input type="checkbox"/> 1 Yes <input type="checkbox"/> 2 No<br/><input type="checkbox"/> 3 Unknown</p> <p><input type="checkbox"/> 5 Fifth episode<br/>Month/Year: _____<br/>Location: _____<br/>Resolved: <input type="checkbox"/> 1 Yes <input type="checkbox"/> 2 No<br/><input type="checkbox"/> 3 Unknown</p> <p><input type="checkbox"/> 6 Sixth episode<br/>Month/Year: _____<br/>Location: _____<br/>Resolved: <input type="checkbox"/> 1 Yes <input type="checkbox"/> 2 No<br/><input type="checkbox"/> 3 Unknown</p> <p><input type="checkbox"/> 7 Seventh episode<br/>Month/Year: _____<br/>Location: _____<br/>Resolved: <input type="checkbox"/> 1 Yes <input type="checkbox"/> 2 No<br/><input type="checkbox"/> 3 Unknown</p> <p><input type="checkbox"/> 8 Eighth episode<br/>Month/Year: _____<br/>Location: _____</p> |
|--|--|----------------------------------------------------------------------------------------------------------------------------------------------------------------------------------------------------------------------------------------------------------------------------------------------------------------------------------------------------------------------------------------------------------------------------------------------------------------------------------------------------------------------------------------------------------------------------------------------------------------------------------------------------------------------------------------------------------------------------------------------------------------------------------------------------------------------------------------------------------------------------------------------------------------------------------------------------------------------------------------------------------------------------------------------------------------------------------------------------------------------------------------------------------------------------------------------------------------------------------------------------------------------------------------------------------------------------------------------------------------------------------------------------------------------------------------------------------------------------------------------|

Employee Industry Number: \_\_\_\_\_

|  |  |                                                                                                                                                                                                                                                                                                                                                                                                                                                                                                                                                     |  |
|--|--|-----------------------------------------------------------------------------------------------------------------------------------------------------------------------------------------------------------------------------------------------------------------------------------------------------------------------------------------------------------------------------------------------------------------------------------------------------------------------------------------------------------------------------------------------------|--|
|  |  | <p>Resolved: <input type="checkbox"/> 1 Yes <input type="checkbox"/> 2 No<br/><input type="checkbox"/> 3 Unknown</p> <p><input type="checkbox"/> 9 Ninth episode<br/>Month/Year: _____<br/>Location: _____</p> <p>Resolved: <input type="checkbox"/> 1 Yes <input type="checkbox"/> 2 No<br/><input type="checkbox"/> 3 Unknown</p> <p><input type="checkbox"/> 10 Tenth episode<br/>Month/Year: _____<br/>Location: _____</p> <p>Resolved: <input type="checkbox"/> 1 Yes <input type="checkbox"/> 2 No<br/><input type="checkbox"/> 3 Unknown</p> |  |
|--|--|-----------------------------------------------------------------------------------------------------------------------------------------------------------------------------------------------------------------------------------------------------------------------------------------------------------------------------------------------------------------------------------------------------------------------------------------------------------------------------------------------------------------------------------------------------|--|

***Continue with SECTION H: CURRENT EPISODE OF SKIN LESIONS***

## Introduction

Hello. My name is \_\_\_\_\_

I am a doctor or nurse working for the National Institute for Communicable Diseases (NICD). I would like to ask you some questions on your current episode of skin lesion(s), examine current skin lesion(s) and to take a sample of the skin lesion(s) or bumps on your body to be tested at our laboratory.

This is important so that we can make a diagnosis and treat you appropriately. Your results will be shared with the doctors at the health clinic on the mine.

Taking samples of skin lesions or bumps will take about 10 minutes.

All employee information and results will be kept confidential and will only be used for the purposes of this investigation.

There might be some risk with sample collection. *Explain that the sample collection might be painful to the participant.*

## DOCTOR OR NURSE'S DETAILS

|                                                             |                                                                                                                  |
|-------------------------------------------------------------|------------------------------------------------------------------------------------------------------------------|
| Name and surname or initials of person completing the form: |                                                                                                                  |
| Date of completion (DD/MM/YYYY):                            | 21/02/2018                                                                                                       |
| Shift                                                       | <input type="checkbox"/> 1 Morning<br><input type="checkbox"/> 2 Afternoon<br><input type="checkbox"/> 3 Evening |

| SECTION H: CURRENT EPISODE OF SKIN LESIONS |                                                                                                                                                                                                  |                                                                                                                                                                                                                                                                                                                                                                                                                                                                           |
|--------------------------------------------|--------------------------------------------------------------------------------------------------------------------------------------------------------------------------------------------------|---------------------------------------------------------------------------------------------------------------------------------------------------------------------------------------------------------------------------------------------------------------------------------------------------------------------------------------------------------------------------------------------------------------------------------------------------------------------------|
| <p><b>Q58</b></p>                          | <p>When did the skin lesion(s) occur on your body?</p> <p>If the participant does not know when the skin lesion(s) occurred; ask how many days/week(s) ago did he notice the skin lesion(s).</p> | <p>Date (DD/MM/YYYY):<br/>_____</p> <p>_____ day(s)</p> <p>_____ week(s)*</p> <p><i>*One week is equivalent to seven days</i></p>                                                                                                                                                                                                                                                                                                                                         |
| <p><b>Q59</b></p>                          | <p>Location of skin lesions (<b>tick all that apply</b>)</p>                                                                                                                                     | <p><input type="checkbox"/> 1 Face</p> <p><input type="checkbox"/> 2 Hands</p> <p><input type="checkbox"/> 3 Fingers</p> <p><input type="checkbox"/> 4 Groin</p> <p><input type="checkbox"/> 5 Axillae</p> <p><input type="checkbox"/> 6 Head and neck</p> <p><input type="checkbox"/> 7 Upper limbs</p> <p><input type="checkbox"/> 8 Trunk and back</p> <p><input type="checkbox"/> 9 Lower limbs</p> <p><input type="checkbox"/> 10 Other (specify)</p> <p>_____</p>   |
| <p><b>Q60</b></p>                          | <p>Description of skin lesion(s) (<b>tick all that apply</b>)</p>                                                                                                                                | <p><input type="checkbox"/> 1 Boils</p> <p><input type="checkbox"/> 2 Furuncles</p> <p><input type="checkbox"/> 3 Superficial abscesses</p> <p><input type="checkbox"/> 4 Subcutaneous abscesses</p> <p><input type="checkbox"/> 5 Ulcers</p> <p><input type="checkbox"/> 6 Infected lacerations</p> <p><input type="checkbox"/> 7 Nodules on extremities</p> <p><input type="checkbox"/> 8 Cellulitis</p> <p><input type="checkbox"/> 9 Other (specify)</p> <p>_____</p> |
| <p><b>Q61</b></p>                          | <p>Other description of skin lesion(s) on presentation (<b>tick all that apply</b>)</p>                                                                                                          | <p><input type="checkbox"/> 1 Painful</p> <p><input type="checkbox"/> 2 Swollen</p> <p><input type="checkbox"/> 3 Skin irritation</p> <p><input type="checkbox"/> 4 Itching</p>                                                                                                                                                                                                                                                                                           |

|            |                                                                              |                                                                                                                                                                                                                                                                                                                                                                                                                                                                                                                                                                                                           |  |
|------------|------------------------------------------------------------------------------|-----------------------------------------------------------------------------------------------------------------------------------------------------------------------------------------------------------------------------------------------------------------------------------------------------------------------------------------------------------------------------------------------------------------------------------------------------------------------------------------------------------------------------------------------------------------------------------------------------------|--|
|            |                                                                              | <input type="checkbox"/> 5 Pus present<br><input type="checkbox"/> 6 Other (specify)<br>_____                                                                                                                                                                                                                                                                                                                                                                                                                                                                                                             |  |
| <b>Q62</b> | Did you attend the mine clinic for treatment? ( <b>tick all that apply</b> ) | <input type="checkbox"/> 1 Yes <input type="checkbox"/> 2 No<br><input type="checkbox"/> 3 Unknown<br><br>Did the participant seek health care elsewhere?<br><input type="checkbox"/> 1 Yes <input type="checkbox"/> 2 No <input type="checkbox"/><br>3 Unknown<br>If Yes, specify where:<br><br><input type="checkbox"/> 1 Local clinic<br><input type="checkbox"/> 2 Pharmacy<br><input type="checkbox"/> 3 Traditional healer<br><input type="checkbox"/> 4 Relative<br><input type="checkbox"/> 5 Friend<br><input type="checkbox"/> 6 Other (specify)<br>_____<br><input type="checkbox"/> 7 Unknown |  |
| <b>Q63</b> | Have you had treatment with antibiotics?                                     | <input type="checkbox"/> 1 Yes <input type="checkbox"/> 2 No <input type="checkbox"/><br>3 Unknown<br>If Yes, specify which antibiotics:<br><br>_____<br>_____                                                                                                                                                                                                                                                                                                                                                                                                                                            |  |
| <b>Q64</b> | Have you had treatment with incision and drainage?                           | <input type="checkbox"/> 1 Yes <input type="checkbox"/> 2 No <input type="checkbox"/><br>3 Unknown<br>If Yes, specify the date (DD/MM/YYYY):<br><br>_____<br>_____                                                                                                                                                                                                                                                                                                                                                                                                                                        |  |

**Continue with SECTION I: SAMPLE COLLECTION**

Employee Industry Number: \_\_\_\_\_

|                                                                                    |                                                                                                                                                      |
|------------------------------------------------------------------------------------|------------------------------------------------------------------------------------------------------------------------------------------------------|
| Can we take a sample of the skin lesion or bump to be tested at our laboratory?    | <input type="checkbox"/> 1 Yes (continue with sample collection)<br><input type="checkbox"/> 2 No                                                    |
| Can we take a picture of the skin lesion or bump to be used for the investigation? | <input type="checkbox"/> 1 Yes (continue with taking a picture. Save the image using the employee industry number.)<br><input type="checkbox"/> 2 No |
| Participant signature: _____ Date: 21 February 2018                                |                                                                                                                                                      |

|                      |                            |                                                                                                                                             |                 |
|----------------------|----------------------------|---------------------------------------------------------------------------------------------------------------------------------------------|-----------------|
| <b>Q65</b>           | <b>Sample collected:</b>   | <input type="checkbox"/> 1 Yes <input type="checkbox"/> 2 No<br>If No, specify the reason:<br>_____                                         |                 |
| <b>Sample number</b> | <b>Site of skin lesion</b> | <b>Sample type</b>                                                                                                                          | <b>Comments</b> |
|                      |                            | <input type="checkbox"/> 1 Pus aspirate<br><input type="checkbox"/> 2 Skin scrapings<br><input type="checkbox"/> 3 Other (specify)<br>_____ |                 |
|                      |                            | <input type="checkbox"/> 1 Pus aspirate<br><input type="checkbox"/> 2 Skin scrapings<br><input type="checkbox"/> 3 Other (specify)<br>_____ |                 |
|                      |                            | <input type="checkbox"/> 1 Pus aspirate<br><input type="checkbox"/> 2 Skin scrapings<br><input type="checkbox"/> 3 Other (specify)<br>_____ |                 |

***End of questionnaire***

***Thank you for your participation***
